# Supplementary material for: Comprehensive Geriatric Assessment and Quality of Life Aspects in Patients with Recurrent/Metastatic Head and Neck Squamous Cell Carcinoma (HNSCC)
Source: MDPI journal article supplement (doi:10.3390/jcm12175738), 2023-09-03
Supplement: s1 [file s1]

**Table S8.** T2 Spearman rank correlations ( $r_s$ ) for associations between CGA parameters and questionnaire subscales.Significant p-values ( $\alpha \leq .05$ ) are marked bold.

| CGA Parameter                           | CCI    |              | G8     |              | ECOG   |              | TUG    |              |
|-----------------------------------------|--------|--------------|--------|--------------|--------|--------------|--------|--------------|
| Questionnaire                           | $r_s$  | $p$          | $r_s$  | $p$          | $r_s$  | $p$          | $r_s$  | $p$          |
| HADS-A                                  | 0.139  | 0.594        | -0.470 | 0.057        | 0.292  | 0.255        | 0.012  | 0.963        |
| HADS-D                                  | 0.234  | 0.365        | -0.666 | 0.003        | 0.261  | 0.311        | 0.242  | 0.349        |
| LORQv3 total                            | 0.445  | 0.084        | -0.252 | 0.347        | 0.035  | 0.897        | -0.041 | 0.880        |
| LORQv3 section1                         | 0.341  | 0.196        | -0.465 | 0.070        | 0.367  | 0.162        | 0.096  | 0.725        |
| LORQv3 Oral<br>Function                 | 0.392  | 0.133        | -0.317 | 0.231        | 0.412  | 0.113        | 0.014  | 0.960        |
| LORQv3 Orofacial<br>Appearance          | 0.051  | 0.850        | -0.427 | 0.099        | -0.057 | 0.834        | 0.237  | 0.378        |
| LORQv3 Social<br>Interaction            | 0.404  | 0.121        | -0.420 | 0.105        | 0.114  | 0.110        | 0.178  | 0.509        |
| LORQv3 Section2                         | -0.204 | 0.661        | 0.327  | 0.474        | -0.722 | 0.067        | -0.577 | 0.175        |
| EORTC-ELD-14<br>JointStiffness          | 0.411  | 0.101        | -0.087 | 0.740        | 0.299  | 0.244        | -0.063 | 0.810        |
| EORTC-ELD-14<br>Mobility                | -0.286 | 0.284        | 0.435  | 0.092        | -0.626 | <b>0.010</b> | -0.511 | <b>0.043</b> |
| EORTC-ELD-14<br>FamilySupport           | 0.580  | <b>0.015</b> | -0.585 | <b>0.014</b> | 0.601  | <b>0.011</b> | 0.310  | 0.226        |
| EORTC-ELD-14<br>Worries about<br>others | -0.228 | 0.379        | 0.368  | 0.147        | -0.280 | 0.277        | -0.135 | 0.605        |
| EORTC-ELD-14<br>Future worries          | 0.300  | 0.242        | -0.547 | <b>0.023</b> | 0.396  | 0.116        | 0.024  | 0.926        |
| EORTC-ELD-14<br>Maintaining<br>Purpose  | 0.308  | 0.230        | -0.222 | 0.393        | 0.070  | 0.789        | 0.024  | 0.926        |
| EORTC-ELD-14<br>Burden of illness       | -0.259 | 0.316        | -0.193 | 0.458        | 0.352  | 0.166        | 0.425  | 0.089        |
| EORTC-C30<br>Physical<br>Functioning    | 0.278  | 0.281        | -0.488 | <b>0.047</b> | 0.586  | <b>0.013</b> | 0.335  | 0.188        |
| EORTC-C30 Role<br>Functioning           | 0.260  | 0.331        | -0.249 | 0.353        | 0.138  | 0.610        | 0.247  | 0.356        |
| EORTC-C30<br>Emotional<br>Functioning   | 0.250  | 0.350        | -0.330 | 0.211        | 0.497  | <b>0.050</b> | 0.222  | 0.408        |
| EORTC-C30<br>Cognitive<br>Functioning   | 0.524  | <b>0.037</b> | -0.677 | <b>0.004</b> | 0.557  | <b>0.025</b> | 0.462  | 0.072        |
| EORTC-C30 Social<br>Functioning         | 0.188  | 0.486        | 0.034  | 0.902        | 0.389  | 0.137        | -0.063 | 0.816        |
| EORTC-C30<br>Dyspnoe                    | 0.000  | 1.000        | -0.196 | 0.467        | 0.187  | 0.488        | -0.205 | 0.446        |

|                                        |        |              |        |              |        |              |        |              |
|----------------------------------------|--------|--------------|--------|--------------|--------|--------------|--------|--------------|
| EORTC-C30<br>Insomnia                  | 0.330  | 0.212        | -0.571 | <b>0.021</b> | 0.512  | <b>0.043</b> | 0.073  | 0.789        |
| EORTC-C30<br>Appetite loss             | 0.105  | 0.697        | -0.320 | 0.227        | 0.175  | 0.518        | 0.558  | <b>0.025</b> |
| EORTC-C30<br>Nausea                    | 0.364  | 0.165        | -0.379 | 0.147        | 0.426  | 0.100        | 0.217  | 0.420        |
| EORTC-C30<br>Constipation              | 0.209  | 0.437        | 0.154  | 0.568        | 0.060  | 0.824        | -0.372 | 0.155        |
| EORTC-C30<br>Diarrhoe                  | -0.532 | <b>0.034</b> | 0.682  | <b>0.004</b> | -0.638 | <b>0.008</b> | -0.335 | 0.205        |
| EORTC-C30<br>Fatigue                   | -0.354 | 0.179        | 0.388  | 0.138        | -0.312 | 0.239        | -0.351 | 0.183        |
| EORTC-C30 Pain                         | -0.516 | <b>0.041</b> | 0.372  | 0.156        | -0.436 | 0.091        | -0.041 | 0.879        |
| EORTC-C30<br>Financial<br>difficulties | -0.357 | 0.174        | 0.592  | <b>0.016</b> | -0.363 | 0.167        | -0.408 | 0.116        |
| EORTC-C30<br>QoL/Global health         | -0.416 | 0.109        | 0.230  | 0.392        | -0.471 | 0.066        | -0.220 | 0.412        |

| CGA Parameter                           | ADL    |              | IADL   |              | MMSE   |              | MNA    |              |
|-----------------------------------------|--------|--------------|--------|--------------|--------|--------------|--------|--------------|
| Questionnaire                           | $r_s$  | $p$          | $r_s$  | $p$          | $r_s$  | $p$          | $r_s$  | $p$          |
| HADS-A                                  | 0.156  | 0.550        | -0.129 | 0.622        | -0.149 | 0.567        | -0.265 | 0.305        |
| HADS-D                                  | -0.304 | 0.235        | -0.395 | 0.117        | -0.264 | 0.306        | -0.533 | <b>0.028</b> |
| LORQv3 total                            | 0.229  | 0.393        | -0.048 | 0.860        | 0.264  | 0.324        | -0.189 | 0.482        |
| LORQv3 section1                         | 0.091  | 0.737        | -0.271 | 0.309        | 0.120  | 0.658        | -0.574 | <b>0.020</b> |
| LORQv3 Oral<br>Function                 | 0.088  | 0.745        | -0.233 | 0.386        | 0.216  | 0.421        | -0.448 | 0.082        |
| LORQv3 Orofacial<br>Appearance          | 0.058  | 0.831        | -0.141 | 0.602        | -0.021 | 0.940        | -0.444 | 0.085        |
| LORQv3 Social<br>Interaction            | -0.077 | 0.778        | -0.470 | 0.066        | -0.042 | 0.879        | -0.540 | <b>0.031</b> |
| LORQv3 Section2                         | 0.636  | 0.124        | 0.879  | <b>0.009</b> | 0.073  | 0.877        | 0.541  | 0.210        |
| EORTC-ELD-14<br>JointStiffness          | -0.282 | 0.272        | -0.228 | 0.379        | -0.169 | 0.518        | -0.089 | 0.734        |
| EORTC-ELD-14<br>Mobility                | 0.574  | <b>0.020</b> | 0.568  | <b>0.022</b> | 0.705  | <b>0.002</b> | 0.366  | 0.163        |
| EORTC-ELD-14<br>FamilySupport           | -0.388 | 0.124        | -0.591 | <b>0.012</b> | -0.397 | 0.114        | -0.650 | <b>0.005</b> |
| EORTC-ELD-14<br>Worries about<br>others | 0.280  | 0.277        | 0.355  | 0.162        | 0.308  | 0.229        | 0.174  | 0.505        |
| EORTC-ELD-14<br>Future worries          | -0.054 | 0.835        | -0.285 | 0.267        | -0.141 | 0.590        | -0.623 | <b>0.008</b> |
| EORTC-ELD-14<br>Maintaining<br>Purpose  | -0.017 | 0.947        | -0.151 | 0.564        | -0.023 | 0.929        | -0.243 | 0.347        |
| EORTC-ELD-14<br>Burden of illness       | -0.089 | 0.733        | -0.273 | 0.289        | -0.183 | 0.482        | -0.097 | 0.711        |

|                                  |        |              |        |              |        |       |        |              |
|----------------------------------|--------|--------------|--------|--------------|--------|-------|--------|--------------|
| EORTC-C30 Physical Functioning   | -0.508 | <b>0.037</b> | -0.655 | <b>0.004</b> | -0.299 | 0.244 | -0.517 | <b>0.033</b> |
| EORTC-C30 Role Functioning       | -0.245 | 0.359        | -0.435 | 0.092        | -0.294 | 0.270 | -0.287 | 0.282        |
| EORTC-C30 Emotional Functioning  | -0.340 | 0.197        | -0.343 | 0.194        | -0.477 | 0.062 | -0.187 | 0.489        |
| EORTC-C30 Cognitive Functioning  | -0.412 | 0.113        | -0.659 | <b>0.005</b> | -0.410 | 0.115 | -0.712 | <b>0.002</b> |
| EORTC-C30 Social Functioning     | -0.185 | 0.493        | -0.175 | 0.516        | -0.089 | 0.743 | -0.024 | 0.930        |
| EORTC-C30 Dyspnoea               | 0.194  | 0.473        | 0.009  | 0.974        | -0.096 | 0.724 | 0.075  | 0.782        |
| EORTC-C30 Insomnia               | -0.097 | 0.721        | -0.476 | 0.062        | -0.191 | 0.478 | -0.472 | 0.065        |
| EORTC-C30 Appetite loss          | -0.302 | 0.256        | -0.504 | <b>0.047</b> | -0.444 | 0.085 | -0.205 | 0.447        |
| EORTC-C30 Nausea                 | -0.185 | 0.492        | -0.355 | 0.177        | -0.260 | 0.330 | -0.270 | 0.311        |
| EORTC-C30 Constipation           | 0.315  | 0.235        | 0.187  | 0.489        | 0.378  | 0.149 | 0.215  | 0.425        |
| EORTC-C30 Diarrhoea              | 0.409  | 0.115        | 0.543  | <b>0.030</b> | 0.469  | 0.067 | 0.776  | <b>0.000</b> |
| EORTC-C30 Fatigue                | 0.401  | 0.124        | 0.451  | 0.079        | 0.311  | 0.241 | 0.263  | 0.325        |
| EORTC-C30 Pain                   | 0.099  | 0.716        | 0.372  | 0.156        | 0.090  | 0.740 | 0.413  | 0.111        |
| EORTC-C30 Financial difficulties | 0.272  | 0.308        | 0.438  | 0.090        | 0.428  | 0.098 | 0.706  | <b>0.002</b> |
| EORTC-C30 QoL/Global health      | 0.223  | 0.406        | 0.344  | 0.192        | 0.195  | 0.470 | 0.474  | 0.064        |
