# Supplementary material for: Comprehensive Geriatric Assessment and Quality of Life Aspects in Patients with Recurrent/Metastatic Head and Neck Squamous Cell Carcinoma (HNSCC)
Source: MDPI journal article supplement (doi:10.3390/jcm12175738), 2023-09-03
Supplement: s1 [file s1]

**Table S4.** Mean values of the HQoL questionnaire ELD-14 scales (symptom, function) according to the total sample size and regression predictors at first (T1) and second (T2) assessment. SD: Standard deviation.

| Variable                      | Scale                                   |      | Maintaining Purpose |       | Family Support |       |
|-------------------------------|-----------------------------------------|------|---------------------|-------|----------------|-------|
|                               | Assessment time                         |      | T1                  | T2    | T1             | T2    |
| Total                         |                                         | Mean | 63.33               | 51.96 | 55.00          | 50.98 |
|                               |                                         | SD   | 28.41               | 27.56 | 39.40          | 35.59 |
| Age                           | < 65 years                              | Mean | 57.14               | 50.00 | 52.38          | 50.00 |
|                               |                                         | SD   | 21.21               | 25.82 | 42.41          | 27.89 |
|                               | ≥ 65 years                              | Mean | 66.67               | 53.03 | 56.41          | 51.52 |
|                               |                                         | SD   | 31.91               | 29.64 | 39.40          | 40.45 |
| Need for prosthetic treatment | Yes                                     | Mean | 60.78               | 52.38 | 54.90          | 57.14 |
|                               |                                         | SD   | 28.83               | 28.39 | 38.98          | 33.15 |
|                               | No                                      | Mean | 77.78               | 50.00 | 55.56          | 22.22 |
|                               |                                         | SD   | 25.46               | 28.87 | 50.92          | 38.49 |
| Primary HNSCC therapy         | surgery and radio-therapy±chemo-therapy | Mean | 61.46               | 50.00 | 45.83          | 42.86 |
|                               |                                         | SD   | 30.26               | 26.95 | 38.25          | 33.15 |
|                               | surgery only                            | Mean | 70.83               | 61.11 | 91.67          | 88.89 |
|                               |                                         | SD   | 20.97               | 34.69 | 16.67          | 19.25 |
|                               | RCL1                                    | Mean | -                   | 61.11 | -              | 11.11 |
|                               |                                         | SD   | -                   | 25.46 | -              | 19.25 |
| Oral functional capacity      | RCL2                                    | Mean | 66.67               | 66.67 | 40.00          | 33.33 |
|                               |                                         | SD   | 42.49               | 26.35 | 43.46          | 40.82 |
|                               | RCL3                                    | Mean | 63.10               | 45.45 | 59.52          | 60.61 |
|                               |                                         | SD   | 24.62               | 27.98 | 39.61          | 32.72 |
|                               | RCL4                                    | Mean | 50.00               | 50.00 | 66.67          | 33.33 |
|                               |                                         | SD   | -                   | -     | -              | -     |

| Variable                      | Scale                                   |      | Joint Stiffness |       | Mobility |       |
|-------------------------------|-----------------------------------------|------|-----------------|-------|----------|-------|
|                               | Assessment time                         |      | T1              | T2    | T1       | T2    |
| Total                         |                                         | Mean | 46.67           | 47.06 | 50.00    | 47.71 |
|                               |                                         | SD   | 29.42           | 31.31 | 30.48    | 22.49 |
| Age                           | < 65 years                              | Mean | 38.10           | 38.89 | 46.03    | 42.59 |
|                               |                                         | SD   | 35.63           | 25.09 | 30.38    | 19.14 |
|                               | ≥ 65 years                              | Mean | 51.28           | 51.52 | 52.14    | 50.51 |
|                               |                                         | SD   | 25.88           | 34.52 | 31.55    | 24.53 |
| Need for prosthetic treatment | Yes                                     | Mean | 47.06           | 50.00 | 54.25    | 50.79 |
|                               |                                         | SD   | 29.01           | 31.35 | 30.65    | 23.35 |
|                               | No                                      | Mean | 44.44           | 33.33 | 25.93    | 33.33 |
|                               |                                         | SD   | 38.49           | 33.33 | 16.97    | 11.11 |
| Primary HNSCC therapy         | surgery and radio-therapy±chemo-therapy | Mean | 45.83           | 47.62 | 48.61    | 45.24 |
|                               |                                         | SD   | 31.91           | 28.39 | 29.78    | 19.72 |
|                               | surgery only                            | Mean | 50.00           | 44.44 | 55.56    | 59.26 |
|                               |                                         | SD   | 19.25           | 50.92 | 37.41    | 35.72 |
| Oral functional capacity      | RCL1                                    | Mean | -               | 55.56 | -        | 29.63 |
|                               |                                         | SD   | -               | 50.92 | -        | 6.42  |
|                               | RCL2                                    | Mean | 46.67           | 46.67 | 37.78    | 31.11 |
|                               |                                         | SD   | 38.01           | 38.01 | 35.66    | 4.97  |
|                               | RCL3                                    | Mean | 45.24           | 45.45 | 53.97    | 55.56 |
|                               |                                         | SD   | 28.06           | 30.81 | 29.83    | 24.34 |
|                               | RCL4                                    | Mean | 66.67           | 66.67 | 55.56    | 44.44 |
|                               |                                         | SD   | -               | -     | -        | -     |

| Variable                      | Scale                                   |      | Worries about others |       | Future worries |        |
|-------------------------------|-----------------------------------------|------|----------------------|-------|----------------|--------|
|                               | Assessment time                         |      | T1                   | T2    | T1             | T2     |
| Total                         |                                         | Mean | 59.17                | 49.02 | 62.22          | 56.21  |
|                               |                                         | SD   | 29.36                | 37.95 | 27.78          | 25.30  |
| Age                           | < 65 years                              | Mean | 54.76                | 52.78 | 60.32          | 57.41  |
|                               |                                         | SD   | 15.85                | 38.61 | 29.99          | 24.76  |
|                               | ≥ 65 years                              | Mean | 61.54                | 46.97 | 63.25          | 55.56  |
|                               |                                         | SD   | 34.95                | 39.31 | 27.74          | 26.76  |
| Need for prosthetic treatment | Yes                                     | Mean | 63.73                | 54.76 | 66.01          | 59.52  |
|                               |                                         | SD   | 25.16                | 38.36 | 27.35          | 26.73  |
|                               | No                                      | Mean | 33.33                | 22.22 | 40.74          | 40.74  |
|                               |                                         | SD   | 44.10                | 25.46 | 23.13          | 15493  |
| Primary HNSCC therapy         | surgery and radio-therapy±chemo-therapy | Mean | 58.33                | 52.38 | 62.50          | 54.76  |
|                               |                                         | SD   | 26.53                | 34.50 | 27.78          | 24.45  |
|                               | surgery only                            | Mean | 62.50                | 33.33 | 61.11          | 62.96  |
|                               |                                         | SD   | 43.83                | 57.74 | 32.08          | 33.95  |
| Oral functional capacity      | RCL1                                    | Mean | -                    | 44.44 | -              | 37.04  |
|                               |                                         | SD   | -                    | 25.46 | -              | 12.83  |
|                               | RCL2                                    | Mean | 46.67                | 43.33 | 46.67          | 42.22  |
|                               |                                         | SD   | 29.81                | 19.00 | 19.88          | 16.48  |
|                               | RCL3                                    | Mean | 63.10                | 50.00 | 65.87          | 58.59  |
|                               |                                         | SD   | 30.08                | 45.95 | 45106          | 24.89  |
|                               | RCL4                                    | Mean | 66.67                | 66.67 | 88.89          | 100.00 |
|                               |                                         | SD   | -                    | -     | -              | -      |

| Variable                      | Scale                                   |      | Burden of Illness |       |
|-------------------------------|-----------------------------------------|------|-------------------|-------|
|                               | Assessment time                         |      | T1                | T2    |
| Total                         |                                         | Mean | 65.00             | 62.75 |
|                               |                                         | SD   | 18.65             | 23.22 |
| Age                           | < 65 years                              | Mean | 61.90             | 61.11 |
|                               |                                         | SD   | 23.00             | 27.22 |
|                               | ≥ 65 years                              | Mean | 66.67             | 63.64 |
|                               |                                         | SD   | 16.67             | 22.13 |
| Need for prosthetic treatment | Yes                                     | Mean | 65.69             | 64.29 |
|                               |                                         | SD   | 19.96             | 25.20 |
|                               | No                                      | Mean | 61.11             | 55.56 |
|                               |                                         | SD   | 9.62              | 9.61  |
| Primary HNSCC therapy         | surgery and radio-therapy±chemo-therapy | Mean | 64.58             | 60.71 |
|                               |                                         | SD   | 20.07             | 23.21 |
|                               | surgery only                            | Mean | 66.67             | 72.22 |
|                               |                                         | SD   | 13.61             | 25.46 |
| Oral functional capacity      | RCL1                                    | Mean | -                 | 50.00 |
|                               |                                         | SD   | -                 | 0.00  |
|                               | RCL2                                    | Mean | 56.67             | 43.33 |
|                               |                                         | SD   | 19.00             | 41518 |
|                               | RCL3                                    | Mean | 65.48             | 69.70 |
|                               |                                         | SD   | 16.62             | 23.35 |
|                               | RCL4                                    | Mean | 100.00            | 83.33 |
|                               |                                         | SD   | -                 | -     |
