# Supplementary material for: Comprehensive Geriatric Assessment and Quality of Life Aspects in Patients with Recurrent/Metastatic Head and Neck Squamous Cell Carcinoma (HNSCC)
Source: MDPI journal article supplement (doi:10.3390/jcm12175738), 2023-09-03
Supplement: s1 [file s1]

**Table S5.** Means and standard deviations (SD) of evaluated CGA parameters G8 Screening Tool (G8), Barthel Index (ADL), Instrumental Activity of Daily Living (IADL), and Mini Nutritional Assessment (MNA) according to the regression variables at first (T1) and second (T2) assessment.

[illegible]
