# Supplementary material for: Comprehensive Geriatric Assessment and Quality of Life Aspects in Patients with Recurrent/Metastatic Head and Neck Squamous Cell Carcinoma (HNSCC)
Source: MDPI journal article supplement (doi:10.3390/jcm12175738), 2023-09-03
Supplement: s1 [file s1]

**Table S6.** Patients final TNM and UICC classification resulting in palliative treatment.

| Patient No. | TNM resulting in Immunotherapy | UICC |
|-------------|--------------------------------|------|
| 1           | pT2 NX L0 V0 Pn0 G2 R1         | II   |
| 2           | pT3 N0 M0 G1-2 L0 V0 R0        | III  |
| 3           | cT3 cN2c pM1 R2                | IV   |
| 4           | rpT3 N3b M1 G3 L1 V0 R0        | IV   |
| 5           | rpT2 N3b L0 V0 Pn0 G2 R0       | IV   |
| 6           | pT4a NX L0 V0 Pn1 G2-3 RX      | IV   |
| 7           | rpT2 N0 L0 V0 Pn1 G3 R0        | II   |
| 8           | pT1 NX, L0, V0, Pn0, G2, R0    | I    |
| 9           | pT4a NX M0 G2 L0 V0 Pn1 R2     | IV   |
| 10          | rpT4a NX L0 V0 Pn1 G3 RX       | IV   |
| 11          | cT4 N3b M0 G2 L1 V1 RX         | IV   |
| 12          | cT4 N2c MX G3 RX               | IV   |
| 13          | cT4a N0 M0 L0 V0 Pn0 G2-3 RX   | IV   |
| 14          | cT4 N0 M0 G1 L0 V0 Pn0 RX      | IV   |
| 15          | cT3 N0 M0 RX G3 L0 V0 Pn0 RX   | III  |
| 16          | rpT3 N2 L1 V1 Pn1 G3 R1        | IV   |
| 17          | pT4a NX M0 G2-3 L0 V0 R0       | IV   |
| 18          | pT4a N1 M0 G3 L1 V0 R1         | IV   |
| 19          | rpT3 N2b cM1 L1 V0 Pn1 G2 R0   | IV   |
| 20          | cT4 N2b cM0 G2 L0 V0 Pn1 RX    | IV   |
| 21          | pT2 NX L0 V0 Pn0 G2 R1         | II   |
