# Supplementary material for: Comprehensive Geriatric Assessment and Quality of Life Aspects in Patients with Recurrent/Metastatic Head and Neck Squamous Cell Carcinoma (HNSCC)
Source: MDPI journal article supplement (doi:10.3390/jcm12175738), 2023-09-03
Supplement: s1 [file s1]

**Table S2.** Mean values of psychological questionnaire HADS with regard to the entire patient population and regression predictors at baseline (T1) and follow-up (T2) assessment.  
SD: Standard deviation.

| Time of assessment            |                                         |      | T1      |            | T2      |            |
|-------------------------------|-----------------------------------------|------|---------|------------|---------|------------|
|                               |                                         |      | Anxiety | Depression | Anxiety | Depression |
| Total                         |                                         | Mean | 6.67    | 8.57       | 6.18    | 8.35       |
|                               |                                         | SD   | 3.84    | 3.74       | 4.08    | 3.86       |
| Age                           | < 65 years                              | Mean | 6.63    | 8.88       | 8.00    | 9.00       |
|                               |                                         | SD   | 3.25    | 3.68       | 3.58    | 4.90       |
|                               | ≥ 65 years                              | Mean | 6.69    | 8.38       | 5.18    | 8.00       |
|                               |                                         | SD   | 4.29    | 3.91       | 4.14    | 3.38       |
| Need for prosthetic treatment | Yes                                     | Mean | 6.89    | 8.78       | 6.43    | 8.64       |
|                               |                                         | SD   | 3.98    | 3.95       | 4.26    | 3.82       |
|                               | No                                      | Mean | 5.33    | 7.33       | 5.00    | 7.00       |
|                               |                                         | SD   | 3.06    | 2.08       | 3.61    | 4.58       |
| Primary HNSCC therapy         | surgery and radio-therapy±chemo-therapy | Mean | 6.76    | 8.88       | 6.79    | 8.21       |
|                               |                                         | SD   | 3.98    | 4.04       | 3.95    | 4.19       |
|                               | surgery only                            | Mean | 6.25    | 7.25       | 3.33    | 9.00       |
|                               |                                         | SD   | 3.69    | 1.71       | 4.16    | 2.00       |
|                               | RCL1                                    | Mean | -       | -          | 3.67    | 5.00       |
|                               |                                         | SD   | -       | -          | 2.52    | 3.00       |
| Oral functional capacity      | RCL2                                    | Mean | 5.40    | 6.60       | 3.50    | 5.50       |
|                               |                                         | SD   | 3.97    | 3.51       | 3.54    | 2.12       |
|                               | RCL3                                    | Mean | 6.73    | 8.87       | 6.73    | 9.36       |
|                               |                                         | SD   | 3.73    | 3.58       | 3.98    | 3.64       |
|                               | RCL4                                    | Mean | 12.00   | 14.00      | 13.00   | 13.00      |
|                               |                                         | SD   | -       | -          | -       | -          |
