# Supplementary material for: Comprehensive Geriatric Assessment and Quality of Life Aspects in Patients with Recurrent/Metastatic Head and Neck Squamous Cell Carcinoma (HNSCC)
Source: MDPI journal article supplement (doi:10.3390/jcm12175738), 2023-09-03
Supplement: s1 [file s1]

**Table S1.** Mean values of the OHRQoL measured by LORQv3 (Liverpool Oral Rehabilitation Questionnaire version 3) with regard to the entire patient population and regression predictors at baseline (T1) and follow-up (T2) assessment. SD: Standard deviation.

[illegible]
