# Supplementary material for: Comprehensive Geriatric Assessment and Quality of Life Aspects in Patients with Recurrent/Metastatic Head and Neck Squamous Cell Carcinoma (HNSCC)
Source: MDPI journal article supplement (doi:10.3390/jcm12175738), 2023-09-03
Supplement: s1 [file s1]

**Table S3.** Mean values of the HQoL questionnaire QLQ-C30 Symptom, Functional, and Global Health Items with regard to the entire sample size and regression predictors at first (T1) and follow-up (T2) assessment. SD: Standard deviation.

| Variable                      | Scale                                   |      | Physical Functioning |       | Role Functioning |       |
|-------------------------------|-----------------------------------------|------|----------------------|-------|------------------|-------|
|                               | Assessment time                         |      | T1                   | T2    | T1               | T2    |
| Total                         |                                         | Mean | 62.67                | 57.50 | 43.33            | 37.50 |
|                               |                                         | SD   | 21.99                | 25.17 | 33.07            | 30.12 |
| Age                           | < 65 years                              | Mean | 62.86                | 64.00 | 38.10            | 33.33 |
|                               |                                         | SD   | 20.68                | 26.92 | 31.50            | 40.82 |
|                               | ≥ 65 years                              | Mean | 62.56                | 54.55 | 46.15            | 39.39 |
|                               |                                         | SD   | 23.50                | 25.09 | 34.80            | 26.11 |
| Need for prosthetic treatment | Yes                                     | Mean | 59.22                | 55.90 | 41.18            | 37.18 |
|                               |                                         | SD   | 21.97                | 27.15 | 34.42            | 32.03 |
|                               | No                                      | Mean | 82.22                | 64.44 | 55.56            | 38.89 |
|                               |                                         | SD   | 7.70                 | 15.40 | 25.46            | 25.46 |
| Primary HNSCC therapy         | surgery and radio-therapy±chemo-therapy | Mean | 64.17                | 62.05 | 42.71            | 43.59 |
|                               |                                         | SD   | 21.06                | 21.84 | 28.52            | 29.30 |
|                               | surgery only                            | Mean | 56.67                | 37.78 | 45.83            | 11.11 |
|                               |                                         | SD   | 28.02                | 34.21 | 53.36            | 19.25 |
| Oral functional capacity      | RCL1                                    | Mean | -                    | 66.67 | -                | 50.00 |
|                               |                                         | SD   | -                    | 11.55 | -                | 28.87 |
|                               | RCL2                                    | Mean | 76.00                | 68.00 | 53.33            | 50.00 |
|                               |                                         | SD   | 5.96                 | 8.69  | 21.73            | 23.57 |
|                               | RCL3                                    | Mean | 58.10                | 52.67 | 39.29            | 35.00 |
|                               |                                         | SD   | 24.59                | 30.54 | 37.33            | 31.87 |
|                               | RCL4                                    | Mean | 60.00                | 53.33 | 50.00            | 0.00  |
|                               |                                         | SD   | -                    | -     | -                | -     |

| Variable                      | Scale                                   |      | Emotional Functioning |       | Cognitive Functioning |       |
|-------------------------------|-----------------------------------------|------|-----------------------|-------|-----------------------|-------|
|                               | Assessment time                         |      | T1                    | T2    | T1                    | T2    |
| Total                         |                                         | Mean | 55.00                 | 59.38 | 70.00                 | 69.79 |
|                               |                                         | SD   | 21.19                 | 28.36 | 23.32                 | 23.74 |
| Age                           | < 65 years                              | Mean | 48.81                 | 51.67 | 66.67                 | 76.67 |
|                               |                                         | SD   | 23.29                 | 25.95 | 33.33                 | 27.89 |
|                               | ≥ 65 years                              | Mean | 58.33                 | 62.88 | 71.79                 | 66.67 |
|                               |                                         | SD   | 20.13                 | 29.90 | 17.19                 | 22.36 |
| Need for prosthetic treatment | Yes                                     | Mean | 52.94                 | 55.13 | 70.59                 | 69.23 |
|                               |                                         | SD   | 22.23                 | 29.57 | 24.67                 | 26.22 |
|                               | No                                      | Mean | 66.67                 | 77.78 | 66.67                 | 72.22 |
|                               |                                         | SD   | 8.33                  | 12.73 | 16.67                 | 9.62  |
| Primary HNSCC therapy         | surgery and radio-therapy±chemo-therapy | Mean | 54.17                 | 56.41 | 71.88                 | 73.08 |
|                               |                                         | SD   | 23.17                 | 28.50 | 25.62                 | 21.01 |
|                               | surgery only                            | Mean | 58.33                 | 72.22 | 62.50                 | 55.56 |
|                               |                                         | SD   | 11.79                 | 29.27 | 8.33                  | 34.69 |
| Oral functional capacity      | RCL1                                    | Mean | -                     | 72.22 | -                     | 72.22 |
|                               |                                         | SD   | -                     | 17.35 | -                     | 9.62  |
|                               | RCL2                                    | Mean | 70.00                 | 78.33 | 70.00                 | 76.67 |
|                               |                                         | SD   | 17.28                 | 17.28 | 21.73                 | 9.13  |
|                               | RCL3                                    | Mean | 50.60                 | 54.17 | 67.86                 | 66.67 |
|                               |                                         | SD   | 21.05                 | 27.85 | 23.99                 | 29.40 |
|                               | RCL4                                    | Mean | 41.67                 | 16.67 | 100.00                | 66.67 |
|                               |                                         | SD   | -                     | -     | -                     | -     |

| Variable                      | Scale                                   |      | Social Functioning |       | Dyspnoe |       |
|-------------------------------|-----------------------------------------|------|--------------------|-------|---------|-------|
|                               | Assessment time                         |      | T1                 | T2    | T1      | T2    |
| Total                         |                                         | Mean | 45.83              | 39.58 | 28.33   | 43.75 |
|                               |                                         | SD   | 37.02              | 35.42 | 27.09   | 26.44 |
| Age                           | < 65 years                              | Mean | 45.24              | 46.67 | 28.57   | 33.33 |
|                               |                                         | SD   | 39.34              | 44.72 | 29.99   | 33.33 |
|                               | ≥ 65 years                              | Mean | 46.15              | 36.36 | 28.21   | 48.48 |
|                               |                                         | SD   | 37.36              | 32.33 | 26.69   | 22.92 |
| Need for prosthetic treatment | Yes                                     | Mean | 42.16              | 38.46 | 27.45   | 43.59 |
|                               |                                         | SD   | 35.90              | 39.31 | 26.97   | 28.50 |
|                               | No                                      | Mean | 66.67              | 44.44 | 33.33   | 44.44 |
|                               |                                         | SD   | 44.10              | 9.62  | 33.33   | 19.25 |
| Primary HNSCC therapy         | surgery and radio-therapy±chemo-therapy | Mean | 46.88              | 46.15 | 31.25   | 48.72 |
|                               |                                         | SD   | 37.13              | 35.46 | 25.73   | 25.88 |
|                               | surgery only                            | Mean | 41.67              | 11.11 | 16.67   | 22.22 |
|                               |                                         | SD   | 41.94              | 19.25 | 33.33   | 19.25 |
| Oral functional capacity      | RCL1                                    | Mean | -                  | 61.11 | -       | 55.56 |
|                               |                                         | SD   | -                  | 19.25 | -       | 19.25 |
|                               | RCL2                                    | Mean | 63.33              | 66.67 | 40.00   | 53.33 |
|                               |                                         | SD   | 32.06              | 16.67 | 14.91   | 18.26 |
|                               | RCL3                                    | Mean | 42.86              | 30.00 | 21.43   | 36.67 |
|                               |                                         | SD   | 37.39              | 35.83 | 28.06   | 29.19 |
|                               | RCL4                                    | Mean | 0.00               | 0.00  | 66.67   | 66.67 |
|                               |                                         | SD   | -                  | -     | -       | -     |

| Variable                      | Scale                                   |      | Insomnia |        | Appetite loss |       |
|-------------------------------|-----------------------------------------|------|----------|--------|---------------|-------|
|                               | Assessment time                         |      | T1       | T2     | T1            | T2    |
| Total                         |                                         | Mean | 41.67    | 50.00  | 30.00         | 37.50 |
|                               |                                         | SD   | 26.21    | 32.20  | 37.31         | 31.91 |
| Age                           | < 65 years                              | Mean | 47.62    | 60.00  | 33.33         | 40.00 |
|                               |                                         | SD   | 32.53    | 36.51  | 38.49         | 27.89 |
|                               | ≥ 65 years                              | Mean | 38.46    | 45.45  | 28.21         | 36.36 |
|                               |                                         | SD   | 22.96    | 30.81  | 38.12         | 34.82 |
| Need for prosthetic treatment | Yes                                     | Mean | 37.25    | 53.85  | 29.41         | 35.90 |
|                               |                                         | SD   | 26.04    | 32.03  | 35.12         | 31.80 |
|                               | No                                      | Mean | 66.67    | 33.33  | 33.33         | 44.44 |
|                               |                                         | SD   | 0.00     | 33.33  | 57.74         | 38.49 |
| Primary HNSCC therapy         | surgery and radio-therapy±chemo-therapy | Mean | 45.83    | 51.28  | 25.00         | 33.33 |
|                               |                                         | SD   | 23.96    | 32.25  | 31.03         | 27.22 |
|                               | surgery only                            | Mean | 25.00    | 44.44  | 50.00         | 55.56 |
|                               |                                         | SD   | 31.91    | 38.49  | 57.74         | 50.92 |
| Oral functional capacity      | RCL1                                    | Mean | -        | 33.33  | -             | 33.33 |
|                               |                                         | SD   | -        | 33.33  | -             | 33.33 |
|                               | RCL2                                    | Mean | 40.00    | 26.67  | 13.33         | 26.67 |
|                               |                                         | SD   | 27.89    | 27.89  | 18.26         | 27.89 |
|                               | RCL3                                    | Mean | 40.48    | 56.67  | 38.10         | 46.67 |
|                               |                                         | SD   | 26.73    | 27.44  | 41.05         | 32.20 |
|                               | RCL4                                    | Mean | 66.67    | 100.00 | 0.00          | 0.00  |
|                               |                                         | SD   | -        | -      | -             | -     |

| Variable                      | Scale                                   |      | Nausea |      | Constipation |       |
|-------------------------------|-----------------------------------------|------|--------|------|--------------|-------|
|                               | Assessment time                         |      | T1     | T2   | T1           | T2    |
| Total                         |                                         | Mean | 4.17   | 4.17 | 25.00        | 22.92 |
|                               |                                         | SD   | 7.40   | 7.45 | 30.35        | 33.82 |
| Age                           | < 65 years                              | Mean | 2.38   | 3.33 | 23.81        | 13.33 |
|                               |                                         | SD   | 6.30   | 7.45 | 25.20        | 29.81 |
|                               | ≥ 65 years                              | Mean | 5.13   | 4.55 | 25.64        | 27.27 |
|                               |                                         | SD   | 8.01   | 7.78 | 33.76        | 35.96 |
| Need for prosthetic treatment | Yes                                     | Mean | 4.90   | 5.13 | 27.45        | 25.64 |
|                               |                                         | SD   | 7.83   | 8.01 | 31.70        | 36.40 |
|                               | No                                      | Mean | 0.00   | 0.00 | 11.11        | 11.11 |
|                               |                                         | SD   | 0.00   | 0.00 | 19.25        | 19.25 |
| Primary HNSCC therapy         | surgery and radio-therapy±chemo-therapy | Mean | 4.17   | 5.13 | 25.00        | 25.64 |
|                               |                                         | SD   | 7.45   | 8.01 | 31.03        | 36.40 |
|                               | surgery only                            | Mean | 4.17   | 0.00 | 25.00        | 11.11 |
|                               |                                         | SD   | 8.33   | 0.00 | 31.91        | 19.25 |
| Oral functional capacity      | RCL1                                    | Mean | -      | 0.00 | -            | 22.22 |
|                               |                                         | SD   | -      | 0.00 | -            | 38.49 |
|                               | RCL2                                    | Mean | 0.00   | 0.00 | 6.67         | 20.00 |
|                               |                                         | SD   | 0.00   | 0.00 | 14.91        | 29.81 |
|                               | RCL3                                    | Mean | 5.95   | 6.67 | 33.33        | 26.67 |
|                               |                                         | SD   | 8.29   | 8.61 | 32.03        | 37.84 |
|                               | RCL4                                    | Mean | 0.00   | 0.00 | 0.00         | 0.00  |
|                               |                                         | SD   | -      | -    | -            | -     |

| Variable                      | Scale                                   |      | Diarrhoe |       | Fatigue |       |
|-------------------------------|-----------------------------------------|------|----------|-------|---------|-------|
|                               | Assessment time                         |      | T1       | T2    | T1      | T2    |
| Total                         |                                         | Mean | 5.00     | 22.92 | 46.67   | 61.11 |
|                               |                                         | SD   | 12.21    | 33.82 | 20.90   | 20.29 |
| Age                           | < 65 years                              | Mean | 4.76     | 0.00  | 49.21   | 53.33 |
|                               |                                         | SD   | 12.60    | 0.00  | 21.14   | 18.26 |
|                               | ≥ 65 years                              | Mean | 5.13     | 33.33 | 45.30   | 64.65 |
|                               |                                         | SD   | 12.52    | 36.51 | 21.50   | 20.98 |
| Need for prosthetic treatment | Yes                                     | Mean | 5.88     | 25.64 | 46.41   | 61.54 |
|                               |                                         | SD   | 13.10    | 36.40 | 20.50   | 20.60 |
|                               | No                                      | Mean | 0.00     | 11.11 | 48.15   | 59.26 |
|                               |                                         | SD   | 0.00     | 19.25 | 27.96   | 23.13 |
| Primary HNSCC therapy         | surgery and radio-therapy±chemo-therapy | Mean | 6.25     | 20.51 | 51.39   | 56.41 |
|                               |                                         | SD   | 13.44    | 28.99 | 18.98   | 18.40 |
|                               | surgery only                            | Mean | 0.00     | 33.33 | 27.78   | 21.48 |
|                               |                                         | SD   | 0.00     | 57.74 | 19.25   | 16.97 |
| Oral functional capacity      | RCL1                                    | Mean | -        | 33.33 | -       | 51.85 |
|                               |                                         | SD   | -        | 33.33 | -       | 23.13 |
|                               | RCL2                                    | Mean | 6.67     | 26.67 | 48.89   | 46.67 |
|                               |                                         | SD   | 14.91    | 27.89 | 18.59   | 18.26 |
|                               | RCL3                                    | Mean | 4.76     | 23.33 | 44.44   | 67.78 |
|                               |                                         | SD   | 12.10    | 38.65 | 22.22   | 19.21 |
|                               | RCL4                                    | Mean | 0.00     | 0.00  | 66.67   | 66.67 |
|                               |                                         | SD   | -        | -     | -       | -     |

| Variable                      | Scale                                   |      | Pain  |       | Financial Difficulties |       |
|-------------------------------|-----------------------------------------|------|-------|-------|------------------------|-------|
|                               | Assessment time                         |      | T1    | T2    | T1                     | T2    |
| Total                         |                                         | Mean | 47.50 | 43.75 | 38.33                  | 33.33 |
|                               |                                         | SD   | 29.75 | 34.36 | 37.89                  | 38.49 |
| Age                           | < 65 years                              | Mean | 45.24 | 40.00 | 57.14                  | 40.00 |
|                               |                                         | SD   | 32.93 | 43.46 | 41.79                  | 43.46 |
|                               | ≥ 65 years                              | Mean | 48.72 | 45.45 | 28.21                  | 30.30 |
|                               |                                         | SD   | 29.24 | 31.70 | 32.90                  | 37.87 |
| Need for prosthetic treatment | Yes                                     | Mean | 50.00 | 44.87 | 43.14                  | 41.03 |
|                               |                                         | SD   | 31.18 | 35.61 | 38.67                  | 38.86 |
|                               | No                                      | Mean | 33.33 | 38.89 | 11.11                  | 0.00  |
|                               |                                         | SD   | 16.67 | 34.69 | 19.25                  | 0.00  |
| Primary HNSCC therapy         | surgery and radio-therapy±chemo-therapy | Mean | 51.04 | 41.03 | 41.67                  | 33.33 |
|                               |                                         | SD   | 28.20 | 31.63 | 39.44                  | 36.00 |
|                               | surgery only                            | Mean | 33.33 | 55.56 | 25.00                  | 33.33 |
|                               |                                         | SD   | 36.00 | 50.92 | 31.91                  | 57.74 |
| Oral functional capacity      | RCL1                                    | Mean | -     | 33.33 | -                      | 11.11 |
|                               |                                         | SD   | -     | 28.87 | -                      | 19.25 |
|                               | RCL2                                    | Mean | 40.00 | 30.00 | 13.33                  | 20.00 |
|                               |                                         | SD   | 19.00 | 21.73 | 18.26                  | 29.81 |
|                               | RCL3                                    | Mean | 48.81 | 48.33 | 47.62                  | 43.33 |
|                               |                                         | SD   | 33.63 | 39.64 | 40.75                  | 41.72 |
|                               | RCL4                                    | Mean | 66.67 | 66.67 | 33.33                  | 0.00  |
|                               |                                         | SD   | -     | -     | -                      | -     |

| Variable                      | Scale                                   |      | Global Health |       |
|-------------------------------|-----------------------------------------|------|---------------|-------|
|                               | Assessment time                         |      | T1            | T2    |
| Total                         |                                         | Mean | 48.33         | 46.87 |
|                               |                                         | SD   | 20.34         | 24.32 |
| Age                           | < 65 years                              | Mean | 53.57         | 51.67 |
|                               |                                         | SD   | 20.33         | 20.75 |
|                               | ≥ 65 years                              | Mean | 45.51         | 44.70 |
|                               |                                         | SD   | 20.59         | 26.42 |
| Need for prosthetic treatment | Yes                                     | Mean | 44.61         | 46.15 |
|                               |                                         | SD   | 18.39         | 26.27 |
|                               | No                                      | Mean | 69.44         | 50.00 |
|                               |                                         | SD   | 20.97         | 16.67 |
| Primary HNSCC therapy         | surgery and radio-therapy±chemo-therapy | Mean | 47.92         | 51.92 |
|                               |                                         | SD   | 18.13         | 22.09 |
|                               | surgery only                            | Mean | 50.00         | 25.00 |
|                               |                                         | SD   | 31.18         | 25.00 |
| Oral functional capacity      | RCL1                                    | Mean | -             | 58.33 |
|                               |                                         | SD   | -             | 22.05 |
|                               | RCL2                                    | Mean | 58.33         | 58.33 |
|                               |                                         | SD   | 8.33          | 0.00  |
|                               | RCL3                                    | Mean | 45.83         | 42.50 |
|                               |                                         | SD   | 22.82         | 27.62 |
|                               | RCL4                                    | Mean | 33.33         | 33.33 |
|                               |                                         | SD   | -             | -     |
