# Supplementary material for: Comprehensive Geriatric Assessment and Quality of Life Aspects in Patients with Recurrent/Metastatic Head and Neck Squamous Cell Carcinoma (HNSCC)
Source: MDPI journal article supplement (doi:10.3390/jcm12175738), 2023-09-03
Supplement: s1 [file s1]

**Table S7.** T1 Spearman rank correlations ( $r_s$ ) for associations between CGA parameters and questionnaire subscales.Significant  $p$ -values ( $\alpha \leq .05$ ) are marked bold.

| CGA Parameter                           | CCI    |              | G8     |       | ECOG   |              | TUG    |       |
|-----------------------------------------|--------|--------------|--------|-------|--------|--------------|--------|-------|
| Questionnaire                           | $r_s$  | $p$          | $r_s$  | $p$   | $r_s$  | $p$          | $r_s$  | $p$   |
| HADS-A                                  | -0.079 | 0.734        | -0.034 | 0.882 | 0.028  | 0.906        | -0.428 | 0.053 |
| HADS-D                                  | -0.205 | 0.373        | 0.155  | 0.503 | 0.036  | 0.876        | -0.353 | 0.117 |
| LORQv3 total                            | 0.307  | 0.188        | 0.108  | 0.651 | 0.069  | 0.772        | -0.127 | 0.592 |
| LORQv3 section1                         | -0.023 | 0.922        | 0.111  | 0.640 | 0.031  | 0.895        | -0.237 | 0.315 |
| LORQv3 Oral<br>Function                 | -0.002 | 0.994        | 0.129  | 0.587 | -0.052 | 0.829        | -0.200 | 0.397 |
| LORQv3 Orofacial<br>Appearance          | 0.066  | 0.783        | -0.141 | 0.552 | 0.249  | 0.291        | -0.276 | 0.240 |
| LORQv3 Social<br>Interaction            | 0.057  | 0.810        | 0.143  | 0.549 | 0.107  | 0.652        | -0.037 | 0.876 |
| LORQv3 Section2                         | 0.324  | 0.280        | 0.419  | 0.154 | -0.006 | 0.984        | 0.134  | 0.663 |
| EORTC-ELD-14<br>JointStiffness          | 0.354  | 0.125        | 0.074  | 0.757 | -0.009 | 0.970        | -0.067 | 0.778 |
| EORTC-ELD-14<br>Mobility                | 0.337  | 0.146        | 0.426  | 0.061 | 0.326  | 0.161        | 0.185  | 0.436 |
| EORTC-ELD-14<br>FamilySupport           | 0.239  | 0.311        | 0.020  | 0.932 | 0.020  | 0.932        | -0.113 | 0.635 |
| EORTC-ELD-14<br>Worries about<br>others | 0.513  | <b>0.021</b> | 0.226  | 0.339 | 0.392  | 0.087        | 0.074  | 0.756 |
| EORTC-ELD-14<br>Future worries          | 0.346  | 0.135        | 0.019  | 0.938 | 0.213  | 0.368        | -0.193 | 0.415 |
| EORTC-ELD-14<br>Maintaining<br>Purpose  | 0.014  | 0.952        | -0.387 | 0.092 | 0.182  | 0.442        | 0.000  | 1.000 |
| EORTC-ELD-14<br>Burden of illness       | 0.397  | 0.083        | 0.218  | 0.356 | 0.043  | 0.856        | -0.132 | 0.580 |
| EORTC-C30<br>Physical<br>Functioning    | -0.236 | 0.317        | -0.334 | 0.150 | -0.454 | <b>0.044</b> | -0.128 | 0.590 |
| EORTC-C30 Role<br>Functioning           | -0.263 | 0.262        | -0.328 | 0.157 | -0.313 | 0.179        | 0.185  | 0.435 |
| EORTC-C30<br>Emotional<br>Functioning   | -0.279 | 0.233        | -0.189 | 0.424 | -0.340 | 0.142        | 0.366  | 0.112 |
| EORTC-C30<br>Cognitive<br>Functioning   | 0.189  | 0.426        | 0.176  | 0.459 | -0.131 | 0.582        | 0.093  | 0.696 |
| EORTC-C30 Social<br>Functioning         | -0.451 | <b>0.046</b> | 0.107  | 0.653 | -0.526 | 0.017        | 0.101  | 0.670 |
| EORTC-C30<br>Dyspnoe                    | 0.246  | 0.296        | 0.101  | 0.671 | -0.170 | 0.474        | -0.262 | 0.265 |

|                                        |        |       |        |       |        |              |        |       |
|----------------------------------------|--------|-------|--------|-------|--------|--------------|--------|-------|
| EORTC-C30<br>Insomnia                  | 0.119  | 0.618 | -0.223 | 0.346 | -0.048 | 0.840        | -0.069 | 0.772 |
| EORTC-C30<br>Appetite loss             | -0.231 | 0.327 | 0.042  | 0.861 | 0.394  | 0.086        | 0.245  | 0.297 |
| EORTC-C30<br>Nausea                    | 0.372  | 0.106 | 0.221  | 0.349 | 0.401  | 0.080        | 0.182  | 0.444 |
| EORTC-C30<br>Constipation              | 0.194  | 0.412 | -0.016 | 0.948 | 0.266  | 0.256        | 0.000  | 1.000 |
| EORTC-C30<br>Diarrhoe                  | -0.075 | 0.753 | 0.085  | 0.721 | 0.338  | 0.145        | 0.308  | 0.186 |
| EORTC-C30<br>Fatigue                   | 0.090  | 0.707 | 0.050  | 0.833 | 0.070  | 0.769        | -0.092 | 0.699 |
| EORTC-C30 Pain                         | 0.377  | 0.101 | 0.161  | 0.498 | 0.145  | 0.542        | -0.047 | 0.845 |
| EORTC-C30<br>Financial<br>difficulties | 0.248  | 0.292 | 0.031  | 0.896 | 0.563  | 0.010        | -0.086 | 0.719 |
| EORTC-C30<br>QoL/Global health         | -0.362 | 0.117 | -0.276 | 0.238 | -0.449 | <b>0.047</b> | -0.102 | 0.670 |

| CGA Parameter                           | ADL    |              | IADL   |       | MMSE   |       | MNA    |       |
|-----------------------------------------|--------|--------------|--------|-------|--------|-------|--------|-------|
| Questionnaire                           | $r_s$  | $p$          | $r_s$  | $p$   | $r_s$  | $p$   | $r_s$  | $p$   |
| HADS-A                                  | 0.084  | 0.718        | 0.080  | 0.731 | -0.097 | 0.677 | -0.146 | 0.527 |
| HADS-D                                  | 0.053  | 0.820        | -0.071 | 0.761 | -0.072 | 0.757 | 0.062  | 0.789 |
| LORQv3 total                            | -0.062 | 0.795        | -0.208 | 0.379 | -0.035 | 0.883 | 0.213  | 0.366 |
| LORQv3 section1                         | 0.203  | 0.390        | -0.081 | 0.734 | 0.095  | 0.691 | 0.000  | 0.999 |
| LORQv3 Oral<br>Function                 | 0.180  | 0.448        | -0.094 | 0.695 | 0.151  | 0.525 | 0.058  | 0.808 |
| LORQv3 Orofacial<br>Appearance          | 0.092  | 0.700        | 0.044  | 0.855 | -0.186 | 0.431 | -0.335 | 0.148 |
| LORQv3 Social<br>Interaction            | -0.013 | 0.958        | -0.256 | 0.277 | -0.105 | 0.660 | 0.034  | 0.888 |
| LORQv3 Section2                         | -0.278 | 0.357        | -0.364 | 0.222 | 0.155  | 0.613 | 0.130  | 0.672 |
| EORTC-ELD-14<br>JointStiffness          | -0.249 | 0.290        | 0.090  | 0.705 | -0.384 | 0.095 | 0.020  | 0.935 |
| EORTC-ELD-14<br>Mobility                | -0.388 | 0.091        | -0.359 | 0.120 | -0.438 | 0.054 | -0.008 | 0.974 |
| EORTC-ELD-14<br>FamilySupport           | -0.247 | 0.295        | -0.094 | 0.692 | -0.559 | 0.010 | 0.238  | 0.312 |
| EORTC-ELD-14<br>Worries about<br>others | -0.546 | <b>0.013</b> | -0.389 | 0.090 | -0.363 | 0.115 | -0.174 | 0.464 |
| EORTC-ELD-14<br>Future worries          | -0.365 | 0.114        | -0.212 | 0.369 | -0.316 | 0.174 | -0.167 | 0.482 |
| EORTC-ELD-14<br>Maintaining<br>Purpose  | 0.067  | 0.779        | 0.008  | 0.975 | 0.211  | 0.372 | -0.271 | 0.247 |
| EORTC-ELD-14<br>Burden of illness       | -0.175 | 0.460        | 0.028  | 0.907 | -0.321 | 0.167 | -0.002 | 0.993 |

|                                  |        |              |        |              |        |              |        |              |
|----------------------------------|--------|--------------|--------|--------------|--------|--------------|--------|--------------|
| EORTC-C30 Physical Functioning   | 0.672  | 0.001        | 0.551  | <b>0.012</b> | 0.374  | 0.104        | 0.098  | 0.681        |
| EORTC-C30 Role Functioning       | 0.262  | 0.264        | 0.226  | 0.338        | 0.395  | 0.085        | -0.031 | 0.897        |
| EORTC-C30 Emotional Functioning  | 0.074  | 0.757        | 0.136  | 0.569        | 0.432  | 0.057        | 0.116  | 0.626        |
| EORTC-C30 Cognitive Functioning  | 0.194  | 0.413        | 0.161  | 0.497        | 0.611  | <b>0.004</b> | 0.004  | 0.986        |
| EORTC-C30 Social Functioning     | 0.297  | 0.203        | 0.251  | 0.287        | 0.343  | 0.138        | 0.551  | <b>0.012</b> |
| EORTC-C30 Dyspnoea               | -0.025 | 0.917        | 0.242  | 0.304        | -0.034 | 0.887        | -0.055 | 0.816        |
| EORTC-C30 Insomnia               | 0.111  | 0.643        | 0.229  | 0.333        | 0.011  | 0.964        | 0.091  | 0.703        |
| EORTC-C30 Appetite loss          | -0.116 | 0.627        | -0.408 | 0.074        | -0.551 | 0.012        | -0.167 | 0.481        |
| EORTC-C30 Nausea                 | -0.548 | <b>0.012</b> | -0.668 | <b>0.001</b> | -0.332 | 0.152        | -0.030 | 0.900        |
| EORTC-C30 Constipation           | 0.024  | 0.919        | -0.154 | 0.516        | -0.360 | 0.119        | -0.234 | 0.320        |
| EORTC-C30 Diarrhoea              | 0.027  | 0.911        | -0.311 | 0.181        | 0.208  | 0.380        | -0.085 | 0.721        |
| EORTC-C30 Fatigue                | -0.104 | 0.661        | 0.056  | 0.813        | 0.069  | 0.771        | -0.327 | 0.159        |
| EORTC-C30 Pain                   | -0.174 | 0.462        | -0.037 | 0.876        | -0.084 | 0.724        | -0.267 | 0.256        |
| EORTC-C30 Financial difficulties | -0.137 | 0.566        | -0.273 | 0.245        | -0.432 | 0.057        | -0.346 | 0.135        |
| EORTC-C30 QoL/Global health      | 0.419  | 0.066        | 0.432  | 0.057        | 0.146  | 0.538        | 0.350  | 0.130        |
